# Supplementary material for: SIRT3 Deficiency Enhances Ferroptosis and Promotes Cardiac Fibrosis via p53 Acetylation
Source: MDPI journal article supplement (doi:10.3390/cells12101428), 2023-05-19
Supplement: s1 [file s1]

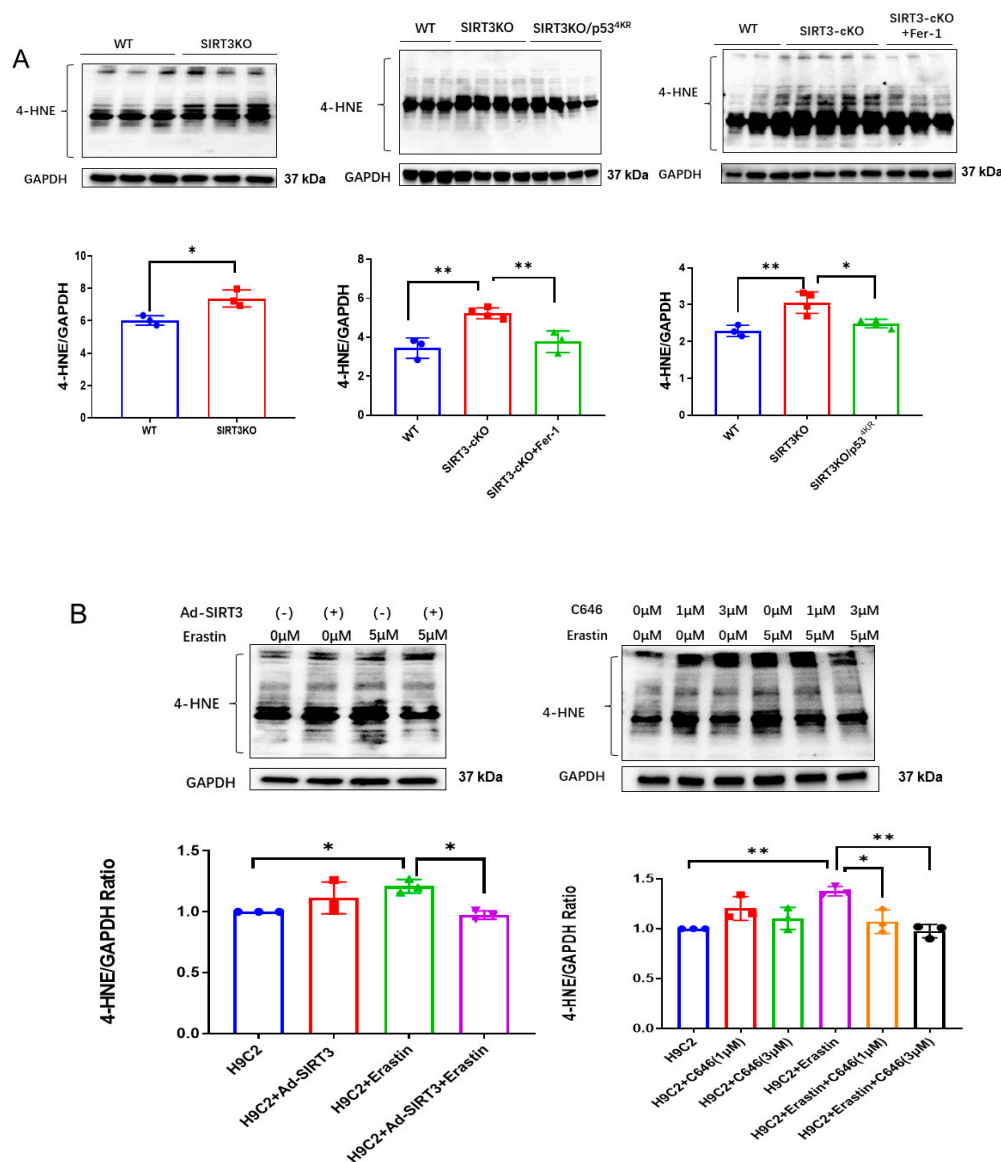

**Supplemental Figure S1. Level of 4-HNE in indicated groups** **A)** Representative immunoblots and analysis of 4-HNE and corresponding GAPDH in the indicated mouse hearts (n=3-4). **B)** Representative immunoblots and relative ratios of 4-HNE/GAPDH to the control H9c2 group in the indicated cells (n=3-4). Mean  $\pm$  S.D., \*\*p<0.01, \*p<0.05.

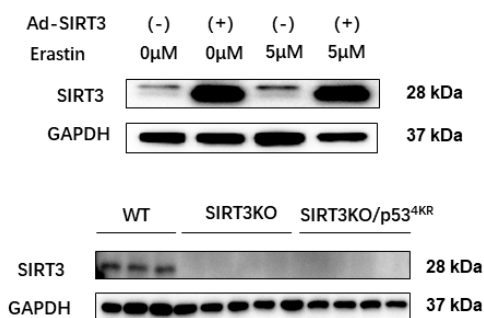

**Supplemental Figure S2. Levels of SIRT3 in indicated groups.** Representative immunoblots and levels of SIRT3 expression in the indicated H9c2 cell lines and mouse hearts. Ad-SIRT3 treatment increased levels of SIRT3 expression in H9c2 cell line with/out Erastin (Top). The expression of SIRT3 was absent in the hearts of SIRT3 KO mice and SIRT3KO/p53<sup>4KR</sup> mice (Bottom).
